# Supplementary material for: Phototransformation of Three Psychoactive Drugs in Presence of Sedimental Water Extractable Organic Matter
Source: MDPI journal article supplement (doi:10.3390/molecules26092466), 2021-04-23

Supporting Information

**Fate of three psychoactive drugs in Lake Pamvotis: adsorption on sediment and photodegradation in presence of sedimental water extractable organic matter**

Cristiana Jiménez-Holgado<sup>1,2</sup>, Vasilios Sakkas<sup>1</sup>, Claire Richard<sup>2\*</sup>

<sup>1</sup> Laboratory of Analytical Chemistry, Department of Chemistry, School of Sciences, University of Ioannina, 45110 Ioannina, Greece

<sup>2</sup> Université Clermont Auvergne, CNRS, SIGMA-Clermont, ICCF, F-63000 Clermont-Ferrand, France

Table S1: Rate constants of photodegradation of SER, CLO and CIT in water ( $k_{\text{direct photolysis}}$ ), in the presence of WEOM ( $k$ ), and in the presence of WEOM+2-propanol ( $k_{2\text{-propanol}}$ ).  $k_{\text{direct photolysis}}^*$  corresponds to  $k_{\text{direct photolysis}}$  after correction for the screen effect of WEOM

| $k(\text{s}^{-1})$                                     | Sertraline            | Clozapine             | Citalopram            |
|--------------------------------------------------------|-----------------------|-----------------------|-----------------------|
| $k_{\text{direct photolysis}}$                         | $1.6 \times 10^{-5}$  | $0.60 \times 10^{-5}$ | $0.13 \times 10^{-5}$ |
| $k_{\text{direct photolysis}}^*$                       | $1.4 \times 10^{-5}$  | $0.53 \times 10^{-5}$ | $0.11 \times 10^{-5}$ |
| $k = k_{\text{direct photolysis}}^* + k_{\text{WEOM}}$ | $3.2 \times 10^{-5}$  | $2.5 \times 10^{-5}$  | $2.1 \times 10^{-5}$  |
| $k_{\text{WEOM}}$                                      | $1.8 \times 10^{-5}$  | $2.0 \times 10^{-5}$  | $2.0 \times 10^{-5}$  |
| $k_{2\text{-propanol}}$                                | $0.49 \times 10^{-5}$ | $0.46 \times 10^{-5}$ | $0.44 \times 10^{-5}$ |

## Section S1 : Screen effect calculation

The rate of light absorption by drugs ( $R_a^d$ ) are calculated using the following Eq. SI-1 when they are alone:

$$R_a^d = \sum_{\lambda=290}^{\lambda=500} I_0^\lambda (1 - 10^{-A^\lambda d}) \quad \text{Eq. SI-1}$$

where  $I_0^\lambda$  is the amount of photons received by the samples for the wavelength range  $\lambda - \lambda + 5$  nm and  $A^\lambda d$  is the absorbance of the drug solution averaged for the same wavelength range.

The rate of light absorption by WEOM ( $R_a^{WEOM}$ ) is also calculated using Eq. SI-1 by replacing  $A^\lambda d$  by  $A^\lambda WEOM$ .

In the presence of WEOM, the rate of light absorption by the drugs,  $R_{a WEOM}^d$  becomes:

$$R_{a WEOM}^d = \sum_{\lambda=290}^{\lambda=500} \frac{A^\lambda d}{A^\lambda d + A^\lambda WEOM} I_0^\lambda (1 - 10^{-(A^\lambda d + A^\lambda WEOM)}) \quad \text{Eq. SI-2}$$

The apparent first order reaction rate constants  $k_{\text{direct photolysis}^*}$  of drug disappearance in presence of WEOM are therefore equal to:

$$k_{\text{direct photolysis}^*} = k_{\text{direct photolysis}} \times R_{a WEOM}^d / I_a^d \quad \text{Eq. SI-3}$$

Figure S1: Photodegradation of 2,4,6-trimethylphenol ( $5 \times 10^{-6}$  M) upon irradiation in the presence of WEOM ( $5 \text{ mgC.L}^{-1}$ ) at pH=7. The slope corresponding to the apparent first order reaction rate constant is equal to  $k = 0.020 \pm 0.002 \text{ min}^{-1}$ .

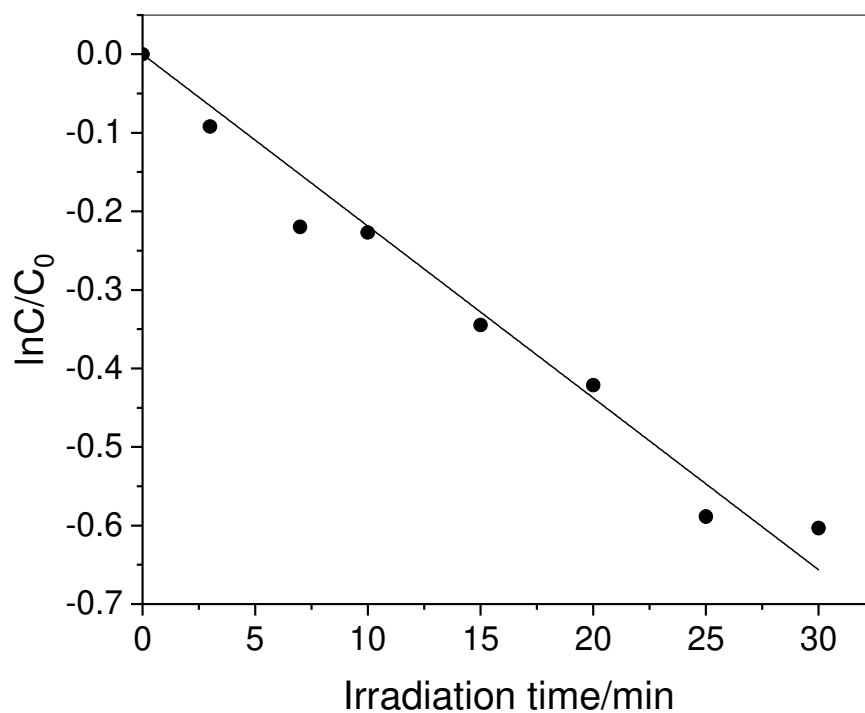

Figure S2: Photodegradation of furfuryl alcohol ( $10^{-4}$  M and  $5 \times 10^{-5}$  M) upon irradiation in the presence of WEOM ( $5 \text{ mgC.L}^{-1}$ ) at pH=7. The slope corresponding to the apparent first order reaction rate constant is equal to  $k = 0.0011 \pm 0.002 \text{ min}^{-1}$ .

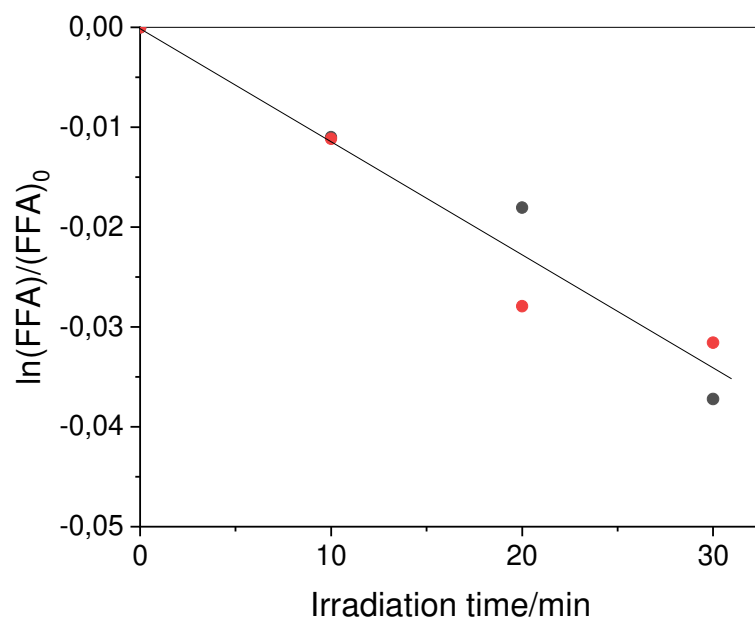

Figure S3: Calibration curve of hydroxyterephthalic acid (TAOH) obtained by UHPLC-HRPS analyses (A) and formation profile of TAOH upon irradiation of terephthalate ( $10^{-5}$  M) in the presence of WEOM ( $5 \text{ mgC.L}^{-1}$ ) at pH=7 (B). TAOH is formed by reaction of terephthalate with  $\text{HO}\cdot$  radicals.

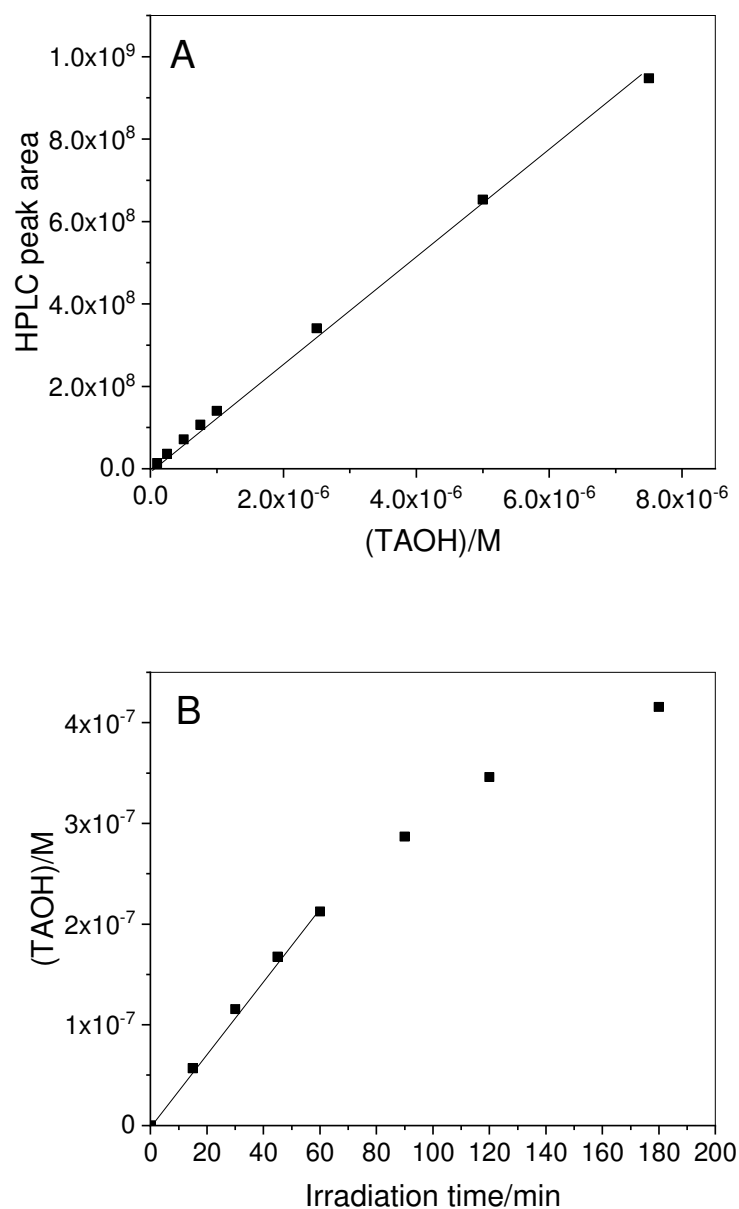

Figure S4: Adsorption of SER (▲), CLO (●) and CIT (○) (0.27-0.29 mg) to sediment. Percentage of adsorbed drug against the amount of sediment in suspension (A) and logarithmic representation of Freundlich equation (B)

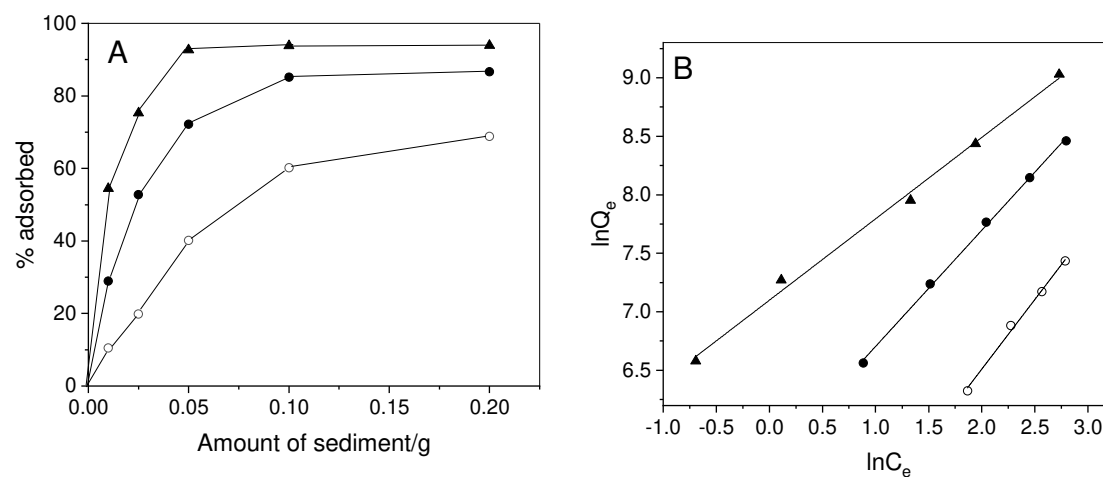

Figure S5: Irradiance of the fluorescent tubes

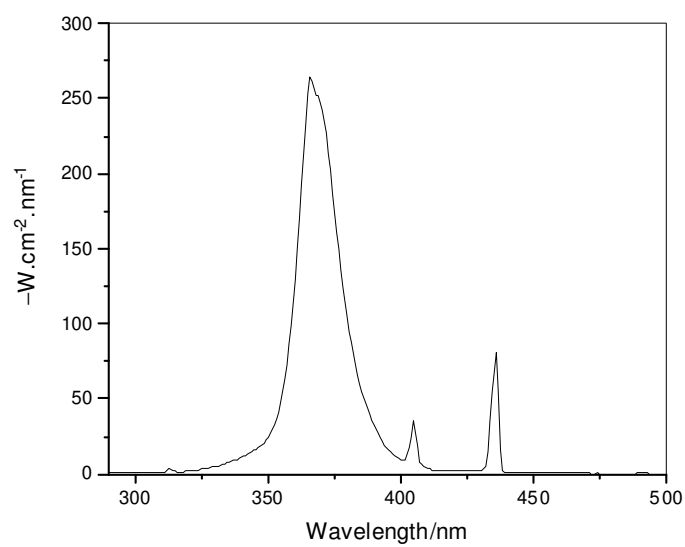

Supplement: s1 [file s1]
